# Supplementary material for: Effect of genetic liability to migraine and its subtypes on breast cancer: a mendelian randomization study
Source: PubMed Central journal article supplement (PMC10510189; doi:10.1186/s12885-023-11337-9), 2023-09-20
Supplement: 12885_2023_11337_MOESM1_ESM.pdf [file 12885_2023_11337_MOESM1_ESM.pdf]

Supplementary Table 1: Summary of the three methods used for MR analysis

| <b>Method</b>                        | <b>Assumptions</b>                                                                                                                                | <b>Strengths</b>                                                                                                                                  |
|--------------------------------------|---------------------------------------------------------------------------------------------------------------------------------------------------|---------------------------------------------------------------------------------------------------------------------------------------------------|
| The inverse variance weighted method | No unbalanced horizontal pleiotropy                                                                                                               | Provides the most precise estimate if all instruments are valid                                                                                   |
| The weighted median method           | More than 50% of weight from valid genetic instruments                                                                                            | Informs about the estimate supported by the majority of evidence                                                                                  |
| MR-Egger regression                  | Associations of the genetic instruments with the exposure are uncorrelated with any pleiotropic effects of the instruments on the outcome         | Provides consistent estimate under this assumption                                                                                                |
| MR-RAPS                              | RAPS considers the measurement error in SNP-exposure effects and the biases caused by weak instruments, and is robust for alleviating pleiotropy. | Overcome the bias of weak instrumental variables and the effects of systematic and idiosyncratic pleiotropy to obtain a robust causal assessment. |
| MR-PRESSO                            | The largest group of candidate instruments with similar estimates is the group of valid instrumental variables.                                   | Detects outliers and provides estimate after removal of outliers                                                                                  |
