# Supplementary material for: Effect of genetic liability to migraine and its subtypes on breast cancer: a mendelian randomization study
Source: PubMed Central journal article supplement (PMC10510189; doi:10.1186/s12885-023-11337-9), 2023-09-20
Supplement: 12885_2023_11337_MOESM2_ESM.pdf [file 12885_2023_11337_MOESM2_ESM.pdf]

**Supplementary Table 4: MR estimates for the causal effect of AM on BC step by step.**

| Outcome    | Step <sup>#</sup> | NSNP | IVW                  |                             | $P(I^2)$ | MRPRESSO           | Weighted median      |               | MR-Egger             |        | $P(\text{intercept})$ | MR-RAPS              |               |
|------------|-------------------|------|----------------------|-----------------------------|----------|--------------------|----------------------|---------------|----------------------|--------|-----------------------|----------------------|---------------|
|            |                   |      | OR (95%CI)           | $P$                         |          | $P(\text{Global})$ | OR (95%CI)           | $P$           | OR (95%CI)           | $P$    |                       | OR (95%CI)           | $P$           |
| Overall BC | 1                 | 84   | 1.064 (1.018, 1.113) | <b>0.0058</b>               | 0.0001   | 0.0003             | 1.062 (1.005, 1.121) | <b>0.0327</b> | 1.047 (0.927, 1.183) | 0.4698 | 0.7822                | 1.065 (1.018, 1.115) | <b>0.0060</b> |
|            | 2                 | 82   | 1.077 (1.034, 1.122) | <b>0.0004</b>               | 0.0064   | 0.0057             | 1.064 (1.007, 1.123) | <b>0.0274</b> | 1.055 (0.942, 1.181) | 0.3568 | 0.6948                | 1.072 (1.027, 1.120) | <b>0.0017</b> |
|            | 3                 | 79   | 1.072 (1.035, 1.110) | <b>8.78×10<sup>-5</sup></b> | 0.0835   | 0.1040             | 1.063 (1.006, 1.123) | <b>0.0283</b> | 1.062 (0.956, 1.179) | 0.2639 | 0.8458                | 1.069 (1.026, 1.113) | <b>0.0015</b> |
| ER+ BC     | 1                 | 84   | 1.062 (1.010, 1.116) | <b>0.0177</b>               | 0.0026   | NA                 | 1.006 (0.944, 1.073) | 0.8483        | 1.032 (0.900, 1.183) | 0.6535 | 0.6606                | 1.059 (1.006, 1.115) | <b>0.0276</b> |
|            | 3                 | 81   | 1.066 (1.023, 1.111) | <b>0.0024</b>               | 0.0680   | 0.0710             | 1.010 (0.947, 1.078) | 0.7533        | 1.038 (0.902, 1.160) | 0.7277 | 0.4897                | 1.064 (1.013, 1.117) | <b>0.0128</b> |
| ER- BC     | 1                 | 84   | 1.062 (0.987, 1.143) | 0.1078                      | 0.0093   | NA                 | 1.037 (0.940, 1.144) | 0.4728        | 1.077 (0.880, 1.319) | 0.4714 | 0.8801                | 1.059 (0.982, 1.142) | 0.1357        |
|            | 3                 | 80   | 1.045 (0.979, 1.115) | 0.1871                      | 0.3348   | 0.3382             | 1.036 (0.939, 1.144) | 0.4784        | 1.073 (0.899, 1.281) | 0.4368 | 0.7499                | 1.050 (0.980, 1.126) | 0.1658        |

Step<sup>#</sup>: 1, MR analysis with the all remained SNPs; 2, MR analysis after eliminating MRPRESSO outlier (with  $P < 0.05$ ); 3, MR analysis after removing all the SNPs (with  $P < 1.00$  in MR-PRESSO test); NSNP, number of single nucleotide polymorphism; MR, Mendelian randomization; IVW: inverse variance weighting; MR-RAPS: Robust Adjusted Profile Score; BC: breast cancer; ER+ BC: estrogen receptor positive breast cancer; ER- BC: estrogen receptor negative breast cancer; AM: any migraine; OR: odds ratio; The  $I^2$  statistic was used to present the heterogeneity among estimates for each SNPs in one analysis;  $P(\text{Global})$ : The  $p$  value for the global test in the MR-PRESSO;  $P(\text{intercept})$ : The  $p$  value for the intercept in the MR-Egger regression was used present the pleiotropy ( $p < 0.05$ ); Bold font: The  $p$ -values  $< 0.05$  are statistically significant. The ORs were scaled to a 1-unit increase in log-transformed OR of migraine. P values are for ORs (95% CIs).
