# Supplementary material for: Effect of genetic liability to migraine and its subtypes on breast cancer: a mendelian randomization study
Source: PubMed Central journal article supplement (PMC10510189; doi:10.1186/s12885-023-11337-9), 2023-09-20
Supplement: 12885_2023_11337_MOESM3_ESM.pdf [file 12885_2023_11337_MOESM3_ESM.pdf]

**Supplementary Table 3: Power estimation of this Mendelian randomization analysis\***

| <b>Disease</b>    | <b>Sample size</b> | <b>Proportion of cases</b> | <b>OR with 80% power in analysis of AM</b> | <b>OR with 80% power in MA</b> | <b>OR with 80% power in MO</b> |
|-------------------|--------------------|----------------------------|--------------------------------------------|--------------------------------|--------------------------------|
| Breast cancer     | 228,951            | 0.537                      | 1.046                                      | 1.132                          | 1.040                          |
| ER+ Breast cancer | 175,475            | 0.396                      | 1.052                                      | 1.155                          | 1.050                          |
| ER- Breast cancer | 127,442            | 0.168                      | 1.082                                      | 1.248                          | 1.075                          |

\* Type 1 error of 5% and explained variance for AM, MA, MO were 6.93%, 0.91%, and 8.26% respectively.

ER+: estrogen receptor positive; ER-: estrogen receptor negative; AM: any migraine; OR: odds ratio; MA: migraine with aura; MO: migraine without aura.
