# Supplementary material for: Effect of genetic liability to migraine and its subtypes on breast cancer: a mendelian randomization study
Source: PubMed Central journal article supplement (PMC10510189; doi:10.1186/s12885-023-11337-9), 2023-09-20
Supplement: 12885_2023_11337_MOESM4_ESM.pdf [file 12885_2023_11337_MOESM4_ESM.pdf]

**Supplementary Table 2: Detail information of selected IVs.**

| Exposure | SNP         | CHR | Position  | EA | NEA | beta   | se     | eaf   | p        | F     |
|----------|-------------|-----|-----------|----|-----|--------|--------|-------|----------|-------|
| AM       | rs1003194   | 11  | 15126085  | A  | G   | 0.0340 | 0.0054 | 0.383 | 2.43E-10 | 39.6  |
| AM       | rs10038882  | 5   | 145752008 | T  | C   | 0.0420 | 0.0060 | 0.748 | 1.33E-12 | 49.0  |
| AM       | rs10166942  | 2   | 234825093 | T  | C   | 0.0990 | 0.0066 | 0.805 | 9.35E-51 | 225.0 |
| AM       | rs10218452  | 1   | 3075597   | G  | A   | 0.1100 | 0.0062 | 0.229 | 7.26E-71 | 314.8 |
| AM       | rs10234636  | 7   | 40427617  | T  | C   | 0.0890 | 0.0081 | 0.111 | 4.43E-28 | 120.7 |
| AM       | rs10405121  | 19  | 13339128  | G  | A   | 0.0330 | 0.0053 | 0.548 | 4.74E-10 | 38.8  |
| AM       | rs10456100  | 6   | 39183470  | T  | C   | 0.0510 | 0.0057 | 0.281 | 9.16E-19 | 80.1  |
| AM       | rs10894756  | 11  | 133745852 | G  | A   | 0.0290 | 0.0053 | 0.573 | 2.83E-08 | 29.9  |
| AM       | rs11031122  | 11  | 30547438  | C  | T   | 0.0370 | 0.0059 | 0.243 | 6.91E-10 | 39.3  |
| AM       | rs11153082  | 6   | 97059666  | G  | A   | 0.0840 | 0.0054 | 0.331 | 7.26E-54 | 242.0 |
| AM       | rs11165300  | 1   | 92177663  | G  | T   | 0.0330 | 0.0060 | 0.239 | 4.72E-08 | 30.3  |
| AM       | rs11487328  | 1   | 174601659 | G  | C   | 0.0480 | 0.0086 | 0.746 | 1.7E-08  | 31.2  |
| AM       | rs11624776  | 14  | 93595591  | A  | C   | 0.0500 | 0.0056 | 0.684 | 9.75E-19 | 79.7  |
| AM       | rs11782789  | 8   | 27266287  | A  | T   | 0.0410 | 0.0070 | 0.836 | 3.03E-09 | 34.3  |
| AM       | rs12057629  | 1   | 15538493  | C  | T   | 0.0400 | 0.0054 | 0.356 | 9.38E-14 | 54.9  |
| AM       | rs12226331  | 11  | 102070976 | T  | A   | 0.0400 | 0.0054 | 0.348 | 1.92E-13 | 54.9  |
| AM       | rs12260159  | 10  | 100702737 | G  | A   | 0.0830 | 0.0103 | 0.925 | 7.33E-16 | 64.9  |
| AM       | rs12260436  | 10  | 104741114 | C  | A   | 0.0360 | 0.0058 | 0.257 | 7.29E-10 | 38.5  |
| AM       | rs12452590  | 17  | 60720058  | G  | T   | 0.0380 | 0.0059 | 0.375 | 2.03E-10 | 41.5  |
| AM       | rs1245463   | 14  | 27661650  | A  | G   | 0.0400 | 0.0053 | 0.388 | 5.72E-14 | 57.0  |
| AM       | rs12598836  | 16  | 4534482   | G  | A   | 0.0380 | 0.0059 | 0.304 | 2.21E-10 | 41.5  |
| AM       | rs12712881  | 2   | 43649780  | A  | C   | 0.0330 | 0.0052 | 0.435 | 3.5E-10  | 40.3  |
| AM       | rs13078967  | 3   | 154289946 | A  | C   | 0.1460 | 0.0178 | 0.973 | 2.16E-16 | 67.3  |
| AM       | rs13235543  | 7   | 73013901  | C  | T   | 0.0580 | 0.0080 | 0.873 | 3.06E-13 | 52.6  |
| AM       | rs138556413 | 2   | 203832867 | C  | T   | 0.1290 | 0.0159 | 0.964 | 4.15E-16 | 65.8  |
| AM       | rs1499963   | 3   | 124607055 | C  | T   | 0.0320 | 0.0056 | 0.679 | 7.48E-09 | 32.7  |
| AM       | rs1542668   | 14  | 42548912  | G  | A   | 0.0310 | 0.0055 | 0.671 | 2.53E-08 | 31.8  |
| AM       | rs17723637  | 9   | 109687403 | G  | A   | 0.0410 | 0.0072 | 0.150 | 8.63E-09 | 32.4  |
| AM       | rs1982072   | 19  | 41864509  | A  | T   | 0.0370 | 0.0056 | 0.700 | 4.22E-11 | 43.7  |
| AM       | rs2000660   | 13  | 110788441 | A  | G   | 0.0500 | 0.0091 | 0.092 | 4.95E-08 | 30.2  |
| AM       | rs2078371   | 1   | 115677183 | C  | T   | 0.1060 | 0.0078 | 0.117 | 5.87E-42 | 184.7 |
| AM       | rs2119930   | 17  | 47514039  | G  | T   | 0.0410 | 0.0052 | 0.405 | 6.69E-15 | 62.2  |
| AM       | rs2274319   | 1   | 156450873 | T  | C   | 0.0730 | 0.0054 | 0.347 | 2.74E-41 | 182.8 |
| AM       | rs246326    | 5   | 122306398 | T  | C   | 0.0480 | 0.0077 | 0.126 | 6.8E-10  | 38.9  |
| AM       | rs2672592   | 10  | 124230750 | T  | G   | 0.0380 | 0.0054 | 0.363 | 1.22E-12 | 49.5  |
| AM       | rs28451064  | 21  | 35593827  | G  | A   | 0.0630 | 0.0080 | 0.869 | 3.52E-15 | 62.0  |
| AM       | rs28455731  | 6   | 121846038 | T  | G   | 0.0690 | 0.0070 | 0.157 | 8.82E-23 | 97.2  |
| AM       | rs28739509  | 1   | 38366907  | C  | T   | 0.0390 | 0.0061 | 0.273 | 2.64E-10 | 40.9  |
| AM       | rs28756401  | 14  | 58761912  | G  | A   | 0.0330 | 0.0058 | 0.715 | 6.4E-09  | 32.4  |
| AM       | rs34273564  | 6   | 72321017  | T  | C   | 0.0340 | 0.0052 | 0.481 | 1E-10    | 42.8  |
| AM       | rs3891689   | 9   | 119258583 | C  | T   | 0.0580 | 0.0061 | 0.234 | 2.28E-21 | 90.4  |

|    |            |    |           |   |   |        |        |       |          |       |
|----|------------|----|-----------|---|---|--------|--------|-------|----------|-------|
| AM | rs4278223  | 9  | 140743200 | T | A | 0.0450 | 0.0073 | 0.636 | 6.24E-10 | 38.0  |
| AM | rs4668251  | 2  | 171234235 | G | C | 0.0330 | 0.0058 | 0.710 | 7.58E-09 | 32.4  |
| AM | rs4705403  | 5  | 149380493 | A | G | 0.0470 | 0.0083 | 0.104 | 1.18E-08 | 32.1  |
| AM | rs4739105  | 8  | 64496159  | T | C | 0.0360 | 0.0064 | 0.211 | 2.85E-08 | 31.6  |
| AM | rs4814864  | 20 | 19469817  | C | G | 0.0650 | 0.0058 | 0.254 | 1.44E-28 | 125.6 |
| AM | rs4907224  | 2  | 96576609  | A | T | 0.0360 | 0.0059 | 0.676 | 1.63E-09 | 37.2  |
| AM | rs4910165  | 11 | 10674044  | G | C | 0.0570 | 0.0055 | 0.678 | 1.09E-24 | 107.4 |
| AM | rs55707505 | 14 | 75362552  | T | C | 0.0310 | 0.0055 | 0.675 | 2.48E-08 | 31.8  |
| AM | rs56067931 | 7  | 120481569 | C | T | 0.0360 | 0.0065 | 0.800 | 4.83E-08 | 30.7  |
| AM | rs56140113 | 1  | 206843108 | C | T | 0.0370 | 0.0064 | 0.780 | 7.76E-09 | 33.4  |
| AM | rs580845   | 9  | 14103618  | A | C | 0.0300 | 0.0055 | 0.601 | 4.3E-08  | 29.8  |
| AM | rs6057599  | 20 | 31168439  | T | C | 0.0410 | 0.0055 | 0.335 | 8.73E-14 | 55.6  |
| AM | rs625686   | 22 | 20142932  | C | T | 0.0340 | 0.0059 | 0.306 | 8.26E-09 | 33.2  |
| AM | rs6556059  | 5  | 172645766 | T | C | 0.0340 | 0.0055 | 0.363 | 8.16E-10 | 38.2  |
| AM | rs6568677  | 6  | 111713302 | A | G | 0.0350 | 0.0063 | 0.209 | 2.09E-08 | 30.9  |
| AM | rs6668908  | 1  | 186913055 | G | T | 0.0310 | 0.0055 | 0.669 | 2.22E-08 | 31.8  |
| AM | rs6795209  | 3  | 88210464  | A | G | 0.0410 | 0.0072 | 0.191 | 1.23E-08 | 32.4  |
| AM | rs7034179  | 9  | 71746838  | T | C | 0.0430 | 0.0052 | 0.429 | 1.6E-16  | 68.4  |
| AM | rs72764846 | 1  | 245847455 | G | A | 0.0380 | 0.0064 | 0.784 | 5.41E-09 | 35.3  |
| AM | rs72923449 | 2  | 176978383 | C | A | 0.0780 | 0.0142 | 0.036 | 4.66E-08 | 30.2  |
| AM | rs7335684  | 13 | 47193696  | G | A | 0.0340 | 0.0060 | 0.247 | 1.05E-08 | 32.1  |
| AM | rs7371912  | 3  | 30472786  | A | G | 0.0440 | 0.0057 | 0.303 | 1.06E-14 | 59.6  |
| AM | rs73805934 | 4  | 35469918  | G | C | 0.0420 | 0.0069 | 0.823 | 1.11E-09 | 37.1  |
| AM | rs74182632 | 19 | 19406126  | A | G | 0.0640 | 0.0112 | 0.055 | 1.43E-08 | 32.7  |
| AM | rs7511672  | 1  | 66178918  | G | A | 0.0310 | 0.0052 | 0.538 | 1.43E-09 | 35.5  |
| AM | rs764508   | 21 | 36935896  | C | T | 0.0320 | 0.0053 | 0.370 | 3.28E-09 | 36.5  |
| AM | rs7684253  | 4  | 57727311  | T | C | 0.0390 | 0.0052 | 0.550 | 4.21E-14 | 56.3  |
| AM | rs7916911  | 10 | 8722944   | T | G | 0.0400 | 0.0057 | 0.284 | 3.18E-12 | 49.2  |
| AM | rs7932866  | 11 | 46548094  | A | G | 0.0430 | 0.0072 | 0.836 | 2.38E-09 | 35.7  |
| AM | rs7996252  | 13 | 78876537  | T | C | 0.0290 | 0.0053 | 0.596 | 4.11E-08 | 29.9  |
| AM | rs8046696  | 16 | 75442143  | T | G | 0.0410 | 0.0055 | 0.428 | 4.76E-14 | 55.6  |
| AM | rs8052831  | 16 | 87578039  | G | A | 0.0430 | 0.0055 | 0.344 | 8.25E-15 | 61.1  |
| AM | rs8077768  | 17 | 78256432  | C | T | 0.0400 | 0.0056 | 0.477 | 9.32E-13 | 51.0  |
| AM | rs8087942  | 18 | 55192245  | A | G | 0.0390 | 0.0055 | 0.667 | 9.71E-13 | 50.3  |
| AM | rs843215   | 2  | 156416638 | G | A | 0.0290 | 0.0051 | 0.468 | 2.61E-08 | 32.3  |
| AM | rs869432   | 10 | 112502662 | A | C | 0.0290 | 0.0053 | 0.584 | 3.54E-08 | 29.9  |
| AM | rs895219   | 2  | 146037564 | C | T | 0.0370 | 0.0056 | 0.300 | 3.74E-11 | 43.7  |
| AM | rs910187   | 20 | 45841052  | G | A | 0.0350 | 0.0054 | 0.628 | 1.14E-10 | 42.0  |
| AM | rs9295536  | 6  | 22131929  | C | A | 0.0360 | 0.0052 | 0.562 | 7.75E-12 | 47.9  |
| AM | rs9349379  | 6  | 12903957  | A | G | 0.0770 | 0.0053 | 0.590 | 1.41E-47 | 211.1 |
| AM | rs9383843  | 6  | 150133954 | C | A | 0.0330 | 0.0055 | 0.647 | 1.35E-09 | 36.0  |
| AM | rs9468830  | 6  | 30749712  | T | G | 0.0360 | 0.0064 | 0.706 | 2.38E-08 | 31.6  |
| AM | rs9894634  | 17 | 1967501   | C | T | 0.0340 | 0.0052 | 0.403 | 9.64E-11 | 42.8  |
| MA | rs11153082 | 6  | 97059666  | G | A | 0.0891 | 0.0140 | 0.325 | 1.99E-10 | 40.5  |

|    |            |    |           |   |   |        |        |       |          |      |
|----|------------|----|-----------|---|---|--------|--------|-------|----------|------|
| MA | rs11031122 | 11 | 30547438  | C | T | 0.0881 | 0.0151 | 0.233 | 6.45E-09 | 33.7 |
| MA | rs12598836 | 16 | 4534482   | G | A | 0.0827 | 0.0148 | 0.294 | 2.81E-08 | 30.9 |
| MO | rs11153082 | 5  | 145752008 | G | A | 0.3249 | 0.1353 | 0.014 | 2.38E-21 | 90.1 |
| MO | rs9349379  | 2  | 234825093 | A | G | 0.5935 | 0.1321 | 0.014 | 6.31E-20 | 83.6 |
| MO | rs10166942 | 7  | 40427617  | T | C | 0.7982 | 0.1512 | 0.017 | 4.96E-18 | 75.0 |
| MO | rs2078371  | 6  | 97059666  | C | T | 0.1155 | 0.1592 | 0.020 | 8.33E-15 | 60.3 |
| MO | rs3891689  | 1  | 115677183 | C | T | 0.2338 | 0.1226 | 0.016 | 1.52E-14 | 59.2 |
| MO | rs2274319  | 1  | 156450873 | T | C | 0.3554 | 0.1084 | 0.014 | 1.77E-14 | 58.9 |
| MO | rs4910165  | 6  | 121846038 | G | C | 0.6715 | 0.0997 | 0.015 | 8.1E-12  | 46.8 |
| MO | rs28455731 | 9  | 119258583 | T | G | 0.1640 | 0.1115 | 0.018 | 8.36E-10 | 37.7 |
| MO | rs7684253  | 20 | 19469817  | T | C | 0.5514 | 0.0815 | 0.014 | 2.38E-09 | 35.7 |
| MO | rs4814864  | 11 | 10674044  | C | G | 0.2494 | 0.0903 | 0.015 | 3.69E-09 | 34.8 |
| MO | rs10038882 | 4  | 57727311  | T | C | 0.7501 | 0.0871 | 0.016 | 4.13E-08 | 30.1 |
| MO | rs10234636 | 6  | 12903957  | T | C | 0.1094 | 0.1165 | 0.021 | 4.29E-08 | 30.1 |

CHR: Chromosome; EA, effect allele; EAF, effect allele frequency; NEA, non-effect allele; se, standard error; AM: any migraine; MA: migraine with aura; MO: migraine without aura.
