# Supplementary material for: Effect of genetic liability to migraine and its subtypes on breast cancer: a mendelian randomization study
Source: PubMed Central journal article supplement (PMC10510189; doi:10.1186/s12885-023-11337-9), 2023-09-20
Supplement: 12885_2023_11337_MOESM5_ESM.pdf [file 12885_2023_11337_MOESM5_ESM.pdf]

**Supplementary Table 5: MR estimates for the causal effect of MA on BC.**

| Outcome    | NSNP | IVW                  |          | $P(I^2)$ | Weighted median      |          | MR-Egger             |          | $P(\text{intercept})$ | MR-RAPS <sup>&amp;</sup> |
|------------|------|----------------------|----------|----------|----------------------|----------|----------------------|----------|-----------------------|--------------------------|
|            |      | OR (95%CI)           | <i>P</i> |          | OR (95%CI)           | <i>P</i> | OR (95%CI)           | <i>P</i> |                       |                          |
| Overall BC | 3    | 0.922 (0.840, 1.103) | 0.0919   | 0.7653   | 0.933 (0.835, 1.043) | 0.2253   | 0.926 (0.051, 16.97) | 0.9672   | 0.9982                | -                        |
| ER+ BC     | 3    | 0.939 (0.840, 1.051) | 0.2739   | 0.7992   | 0.921 (0.809, 1.048) | 0.2127   | 0.817 (0.056, 58.71) | 0.7931   | 0.7730                | -                        |
| ER- BC     | 3    | 0.883 (0.745, 1.047) | 0.1518   | 0.9197   | 0.911 (0.740, 1.121) | 0.3763   | 0.629 (0.003, 119.2) | 0.8907   | 0.8627                | -                        |

NSNP, number of single nucleotide polymorphism; MR, Mendelian randomization; IVW: inverse variance weighting; BC: breast cancer; ER+ BC: estrogen receptor positive breast cancer; ER- BC: estrogen receptor negative breast cancer; MA: migraine with aura; OR: odds ratio; The  $I^2$  statistic was used to present the heterogeneity among estimates for each SNPs in one analysis;  $P(\text{intercept})$ : The  $p$  value for the intercept in the MR-Egger regression was used present the pleiotropy ( $p < 0.05$ ). MR-RAPS<sup>&</sup>: Robust Adjusted Profile Score (number of SNP must be greater than 7); Bold font: The  $p$ -values  $< 0.05$  are statistically significant. The ORs were scaled to a 1-unit increase in log-transformed OR of migraine. P values are for ORs (95% CIs).
