# Supplementary material for: Effect of genetic liability to migraine and its subtypes on breast cancer: a mendelian randomization study
Source: PubMed Central journal article supplement (PMC10510189; doi:10.1186/s12885-023-11337-9), 2023-09-20
Supplement: 12885_2023_11337_MOESM6_ESM.pdf [file 12885_2023_11337_MOESM6_ESM.pdf]

**Supplementary Table 6: MR estimates for the causal effect of MO on BC step by step.**

| Outcome    | Step <sup>#</sup> | NSNP | IVW                  |               | $P(I^2)$ | MRPRESSO           | Weighted median      |        | MR-Egger             |        | $P(\text{intercept})$ | MR-RAPS              |               |
|------------|-------------------|------|----------------------|---------------|----------|--------------------|----------------------|--------|----------------------|--------|-----------------------|----------------------|---------------|
|            |                   |      | OR (95%CI)           | $P$           |          | $P(\text{global})$ | OR (95%CI)           | $P$    | OR (95%CI)           | $P$    |                       | OR (95%CI)           | $P$           |
| Overall BC | 1                 | 12   | 1.042 (1.005, 1.081) | <b>0.0267</b> | 0.3473   | 0.427              | 1.030 (0.977, 1.086) | 0.2741 | 1.012 (0.777, 1.235) | 0.5324 | 0.2998                | 1.041 (1.003, 1.082) | <b>0.0332</b> |
| ER+ BC     | 1                 | 12   | 1.022 (0.979, 1.068) | 0.3217        | 0.5453   | 0.529              | 1.003 (0.940, 1.053) | 0.8582 | 1.002 (0.760, 1.272) | 0.6136 | 0.4795                | 1.026 (0.982, 1.722) | 0.2556        |
| ER+ BC     | 1                 | 12   | 1.089 (1.019, 1.163) | <b>0.0118</b> | 0.4985   | 0.479              | 1.037 (0.948, 1.133) | 0.4313 | 1.102 (0.700, 1.354) | 0.8782 | 0.5149                | 1.085 (1.013, 1.163) | <b>0.0205</b> |

Step<sup>#</sup>: 1, MR analysis with the all remained SNPs; 2, MR analysis after eliminating MRPRESSO outlier (with  $P < 0.05$ ); 3, MR analysis after removing all the SNPs (with  $P < 1.00$  in MR-PRESSO test); Se, standard error; SNP, single nucleotide polymorphism; MR, Mendelian randomization; IVW: inverse variance weighting; MR-RAPS: Robust Adjusted Profile Score; BC: breast cancer; ER+ BC: estrogen receptor positive breast cancer; ER- BC: estrogen receptor negative breast cancer; MO: migraine without aura; OR: odds ratio; The  $I^2$  statistic was used to present the heterogeneity among estimates for each SNPs in one analysis;  $P(\text{global})$ : The  $p$  value for the global test in the MR-PRESSO;  $P(\text{intercept})$ : The  $p$  value for the intercept in the MR-Egger regression was used present the pleiotropy ( $p < 0.05$ ); Bold font: The p-values  $< 0.05$  are statistically significant. The ORs were scaled to a 1-unit increase in log-transformed OR of migraine. P values are for ORs (95% CIs).
