# Supplementary material for: Effect of genetic liability to migraine and its subtypes on breast cancer: a mendelian randomization study
Source: PubMed Central journal article supplement (PMC10510189; doi:10.1186/s12885-023-11337-9), 2023-09-20
Supplement: 12885_2023_11337_MOESM7_ESM.pdf [file 12885_2023_11337_MOESM7_ESM.pdf]

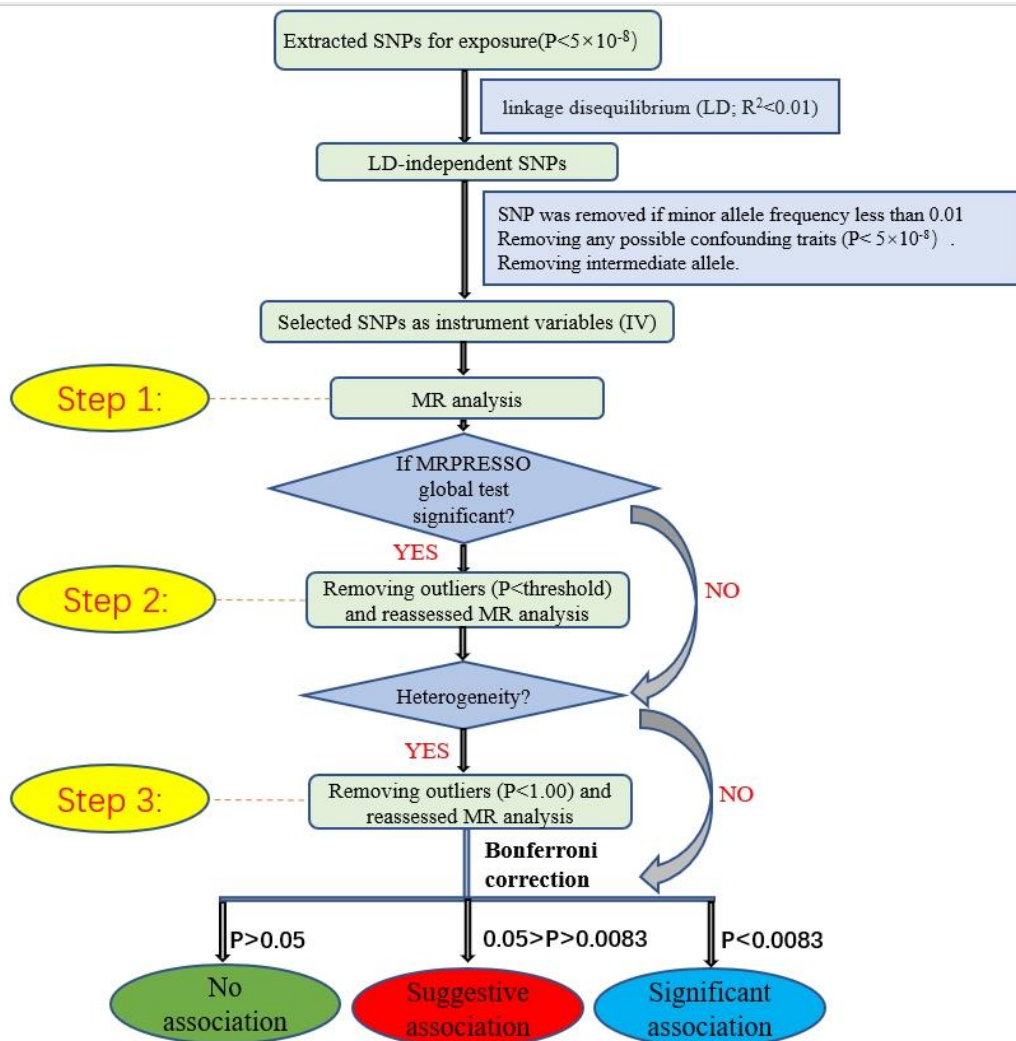

**Supplementary Figure 1:** Flow chart about the analytical methods and how the MR analysis was performed step-by-step.

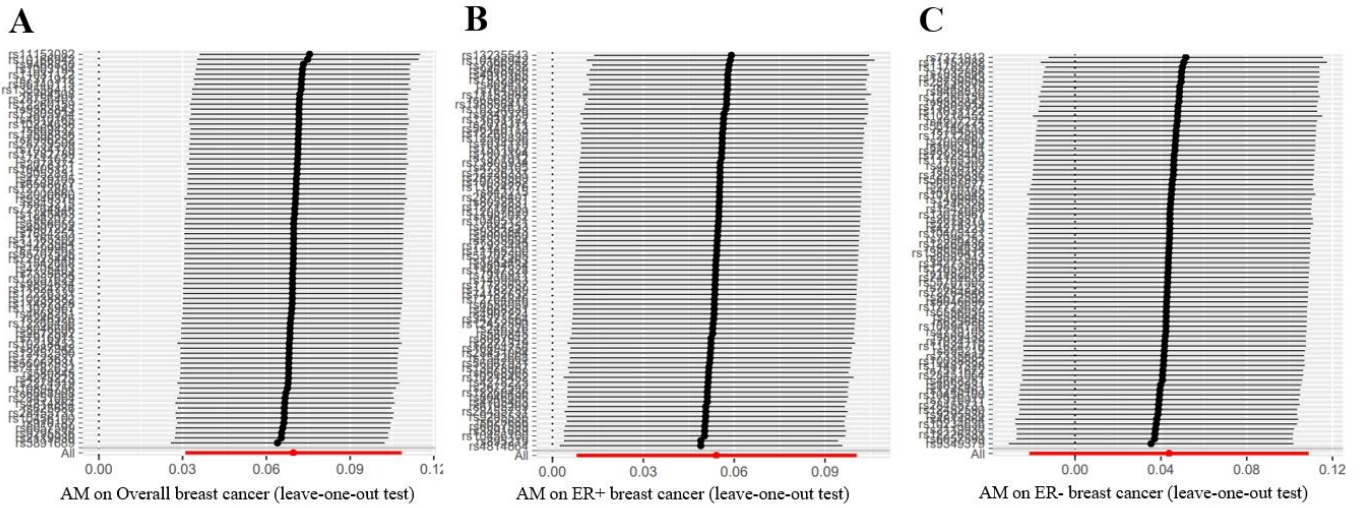

**Supplementary Figure 2.** Leave-one-out plots in the Mendelian randomization analysis of AM on overall breast cancer (A), ER+ breast cancer (B) and ER- breast cancer risk.

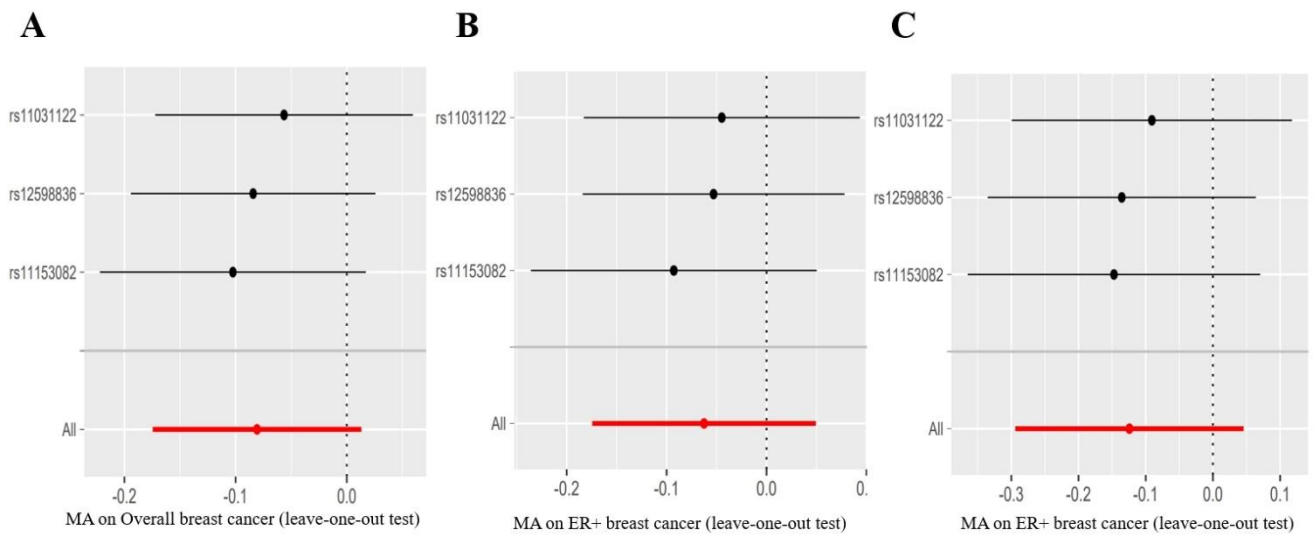

**Supplementary Figure 3.** Leave-one-out plots in the Mendelian randomization analysis of MA on overall breast cancer (A), ER+ breast cancer (B) and ER- breast cancer risk.

**A**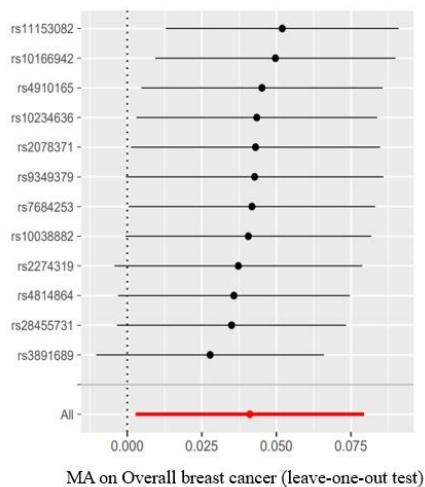**B**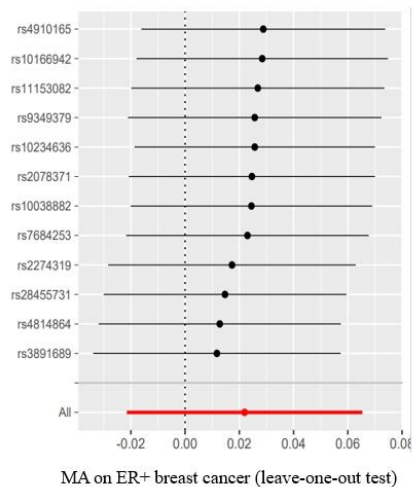**C**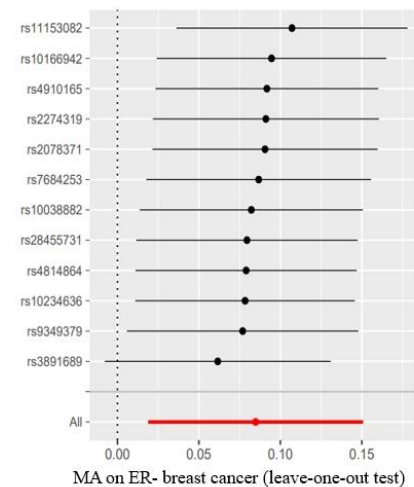

**Supplementary Figure 4.** Leave-one-out plots in the Mendelian randomization analysis of MO on overall breast cancer (A), ER+ breast cancer (B) and ER- breast cancer risk.
